# Supplementary material for: Efficacy and Safety of Human Retinal Progenitor Cells
Source: PubMed Central journal article supplement (PMC4959814; doi:10.1167/tvst.5.4.6), 2016-07-19
Supplement: i2164-2591-5-4-6-s06.pdf [file i2164-2591-5-4-6-s06.pdf]

## SUPPLEMENTARY TABLES

| Tissue and regions examined                                              | Necropsy |     | Histology | Pathology<br>Light microscopy |
|--------------------------------------------------------------------------|----------|-----|-----------|-------------------------------|
|                                                                          | Weigh    | Fix |           |                               |
| Abnormalities (including masses)                                         |          | *   | *         | *                             |
| Adrenals                                                                 |          | *   | *         | *                             |
| Aorta - thoracic                                                         |          | *   | *         | *                             |
| Bone marrow smear                                                        |          | *   |           |                               |
| Brain (cerebellum, cerebrum, midbrain)                                   | *        | *   | *         | *                             |
| Caecum                                                                   |          | *   | *         | *                             |
| Colon                                                                    |          | *   | *         | *                             |
| Duodenum                                                                 |          | *   | *         | *                             |
| Epididymides                                                             | *        | *   | *         | *                             |
| Eyes (left and right), to include optic nerves and hardierian gland      | *        | *   | *         | *                             |
| Femur (femorotibial joint)                                               |          | b)  | *         | *                             |
| Gall bladder                                                             |          | *   | *         | *                             |
| Head                                                                     |          | a)  | #         | #                             |
| Heart (including auricular and ventricular regions)                      | *        | *   | *         | *                             |
| Ileum                                                                    |          | *   | *         | *                             |
| Jejunum                                                                  |          | *   | *         | *                             |
| Kidneys                                                                  | *        | *   | *         | *                             |
| Liver (section from two lobes)                                           | *        | *   | *         | *                             |
| Lungs (section from two major lobes including bronchi)                   |          | *   | *         | *                             |
| Lymph nodes - mesenteric                                                 |          | *   | *         | *                             |
| - left axillary                                                          |          | *   | *         | *                             |
| - mandibular                                                             |          | *   | *         | *                             |
| Oesophagus                                                               |          | *   | *         | *                             |
| Ovaries                                                                  | *        | *   | *         | *                             |
| Pancreas                                                                 |          | *   | *         | *                             |
| Pituitary                                                                |          | *   | *         | *                             |
| Prostate                                                                 | *        | *   | *         | *                             |
| Salivary glands - submandibular                                          |          | *   | †         | †                             |
| - parotid                                                                |          | *   | †         | †                             |
| - sublingual                                                             |          | *   | †         | †                             |
| Sciatic nerves                                                           |          | *   | †         | †                             |
| Seminal vesicles                                                         |          | *   | *         | *                             |
| Skeletal muscle                                                          |          | *   | †         | †                             |
| Skin with mammary glands (inguinal area)                                 |          | *   | *         | *                             |
| Spinal cord (transverse and longitudinal sections at the cervical level) |          | *   | *         | *                             |
| Spleen                                                                   | *        | *   | *         | *                             |
| Sternum                                                                  |          | *   | *         | *                             |
| Stomach                                                                  |          | *   | *         | *                             |
| Testes                                                                   | *        | *   | *         | *                             |
| Thyroid with parathyroids                                                |          | *   | *         | *                             |
| Trachea                                                                  |          | *   | *         | *                             |
| Urinary bladder                                                          |          | *   | *         | *                             |
| Uterus with cervix                                                       | *        | *   | *         | *                             |
| Vagina                                                                   |          | *   | *         | *                             |

In addition, the carcass was retained.

a) Including nasal cavity, paranasal sinuses and nasopharynx.

b) Both hindlimbs retained, one sectioned where appropriate.

\* Organs weighed, samples fixed or sections examined microscopically.

# Examined if effects suspected during the study.

† Only one examined.

**Table S1.** List of tissues that were examined for each NIHIII mouse in the GLP tumorigenicity study.

|                               |
|-------------------------------|
| <b>Tissue</b>                 |
| Left Eye                      |
| Right Eye                     |
| Brain:                        |
| Cerebrum, Mid brain           |
| Cerebellum,                   |
| Spinal cord – cervical: LS/TS |
| Heart:                        |
| Auricle and Ventricle         |
| Spleen                        |
| Lung:                         |
| Left lobe - LS flat,          |
| Right Caudal Lobe -TS         |
| Liver x2                      |
| Pancreas                      |
| Mandibular Lymph Node (LN)    |
| Kidney x2                     |

**Table S2.** Summary of tissues stained by human Alu sequence ISH.

| Reagent                                                                           | Supplier | Product Code | Application / Comment                                                  |
|-----------------------------------------------------------------------------------|----------|--------------|------------------------------------------------------------------------|
| <b>EZ Prep</b>                                                                    | Roche    | 950-102      | Deparaffinization                                                      |
| <b>LCS (Liquid Coverslip)</b>                                                     | Roche    | 650-010      | Liquid Coverslip                                                       |
| <b>RiboWash</b>                                                                   | Roche    | 760-105      | Hybridisation Buffer, Stringency Wash, Negative Buffer Control         |
| <b>Reaction Buffer</b>                                                            | Roche    | 950-300      | Reaction / Wash Buffer                                                 |
| <b>Alu Positive Control Probe</b>                                                 | Roche    | 800-2845     | Label Alu Repeat Sequence in Human Stem Cells                          |
| <b>Negative Control Probe</b>                                                     | Roche    | 800-2847     | Negative Control Probe – discontinued due to manufacture/supply issues |
| <b>Negative (Buffer) Control (RiboWash)</b>                                       | Roche    | 760-105      | Negative buffer control replacing Negative Control Probe               |
| <b>Rabbit anti-FITC</b>                                                           | Bio-Rad  | 4510-7804    | Secondary Linking Antibody                                             |
| <b>Discovery Ab Diluent</b>                                                       | Roche    | 760-108      | Diluent for Secondary Antibody (Rabbit anti-FITC)                      |
| <b>OmniMap anti Rabbit HRP Multimer</b>                                           | Roche    | 760-4311     | Detection & Visualisation                                              |
| <b>ChromoMap DAB Kit comprising: Inhibitor CM DAB CM, H2O2 CM &amp; Copper CM</b> | Roche    | 760-159      | Endogenous Peroxidase Block. Chromogen                                 |
| <b>Hematoxylin II</b>                                                             | Roche    | 790-2208     | Nuclear Counterstain                                                   |
| <b>Blueing Reagent</b>                                                            | Roche    | 760-2037     | Blueing of Haematoxylin                                                |

**Table S3.** Reagents used for the human Alu sequence in situ hybridization (ISH) experiment.

| <b>Ventana Discovery Ultra Protocol Summary</b> |                                                                                                                                        |
|-------------------------------------------------|----------------------------------------------------------------------------------------------------------------------------------------|
| 1                                               | Deparaffinization [Selected]                                                                                                           |
| 2                                               | Warmup Slide to [65 Deg C], and Incubate for [4 Minutes] ( Cycle 1 )                                                                   |
| 3                                               | Incubate for [4 Minutes] ( Cycle 2 )                                                                                                   |
| 4                                               | Incubate for [4 Minutes] ( Cycle 3 )                                                                                                   |
| 5                                               | ISH [Selected]                                                                                                                         |
| 6                                               | 1st Probe [Selected]                                                                                                                   |
| 7                                               | Apply One Drop of [ <b>Appropriate Probe: Alu Positive or Negative Control</b> ] ( Probe #1 ), No Coverslip and Incubate for 8 Minutes |
| 8                                               | Warmup Slide to [85 Deg C], and Incubate for [8 Minutes] ( Denaturation )                                                              |
| 9                                               | Warmup Slide to [47 Deg C], and Incubate for [1 Hour] ( Hybridization )                                                                |
| 10                                              | 1st Stringency Wash [Selected]                                                                                                         |
| 11                                              | Rinse With User Wash #1 RiboWash]                                                                                                      |
| 12                                              | Warmup Slide to [45 Deg C], and Incubate for [4 Minutes] ( Stringency Wash #1 )                                                        |
| 13                                              | 2nd Stringency Wash [Selected]                                                                                                         |
| 14                                              | Rinse With User Wash #2 [RiboWash]                                                                                                     |
| 15                                              | Warmup Slide to [45 Deg C], and Incubate for [4 Minutes] ( Stringency Wash #2 )                                                        |
| 16                                              | Linking Antibody [Selected]                                                                                                            |
| 17                                              | 2nd Antibody [Selected]                                                                                                                |
| 18                                              | Warmup Slide to [37 Deg C] from Very Low Temperatures ( 2nd Antibody )                                                                 |
| 19                                              | Apply One Drop of [DETECTION 1] ( Detection #1 ), and Incubate for [0 Hr 32 Min]                                                       |
| 20                                              | Discovery Detection [Selected]                                                                                                         |
| 21                                              | Incubate for [12 Minutes] ( Inhibitor CM )                                                                                             |
| 22                                              | HRP Detection [Selected]                                                                                                               |
| 23                                              | Apply One Drop of [OMap anti-Rb HRP] ( Multimer HRP ), and Incubate for [12 Minutes]                                                   |
| 24                                              | DAB [Selected]                                                                                                                         |
| 25                                              | Counterstain [Selected]                                                                                                                |
| 26                                              | Use RB for Counterstain [Selected]                                                                                                     |
| 27                                              | Apply One Drop of [HEMATOXYLIN II] ( Counterstain ), and Incubate for [4 Minutes]                                                      |
| 28                                              | Post Counterstain [Selected]                                                                                                           |
| 29                                              | Use RB for Post Counterstain [Selected]                                                                                                |
| 30                                              | Apply One Drop of [BLUING REAGENT] ( Post Counterstain ), and Incubate for [4 Minutes]                                                 |

**Table S4.** Protocol summary for the human Alu sequence ISH screening experiment.

| <b>Procedure</b>                 | <b>Conditions</b>                                                                       | <b>Applicable Reagents</b>                                                              | <b>Protocol Summary Steps</b> |
|----------------------------------|-----------------------------------------------------------------------------------------|-----------------------------------------------------------------------------------------|-------------------------------|
| <b>Deparaffinization</b>         | 3x 4 minute cycles at 65°C                                                              | EZ Prep                                                                                 | 1 - 4                         |
| <b>ISH Probe</b>                 | One drop of appropriate probe / negative control from dispenser. Incubate for 8 minutes | Alu Positive Control<br>Probe<br>Negative Control Probe<br>Negative (Buffer)<br>Control | 5 - 7                         |
| <b>ISH Denaturation</b>          | 85°C for 8 minutes                                                                      | N/A                                                                                     | 8                             |
| <b>ISH Hybridisation</b>         | 47°C for 1 hour                                                                         | N/A                                                                                     | 9                             |
| <b>Stringency Wash</b>           | 2x 4 minute Stringency washes at 45°C                                                   | RiboWash                                                                                | 10 - 15                       |
| <b>Secondary Link Antibody</b>   | Rabbit anti FITC at 2.0µg/ml, 32 minute incubation at 37°C                              | Rabbit anti-FITC at 2.0µg/ml Prepared in Discovery Ab Diluent                           | 16 - 19                       |
| <b>Endogenous Peroxide Block</b> | 12 minute incubation                                                                    | Inhibitor CM– part of ChromoMap DAB Kit                                                 | 20 - 21                       |
| <b>HRP Detection</b>             | 12 minute incubation                                                                    | OmniMap anti Rabbit                                                                     | 22 - 23                       |
| <b>Chromogen</b>                 | ChromoMap DAB Kit                                                                       | ChromoMap DAB Kit                                                                       | 24                            |
| <b>Counterstain</b>              | 4 minute incubation                                                                     | Haematoxylin II                                                                         | 25 - 27                       |
| <b>Blueing</b>                   | 4 minute incubation                                                                     | Blueing Reagent                                                                         | 28 - 30                       |

**Table S5.** Specific conditions used for the human Alu sequence ISH screening experiment.
